# Supplementary material for: Increased Ingestion of Hydroxy-Methionine by Both Sows and Piglets Improves the Ability of the Progeny to Counteract LPS-Induced Hepatic and Splenic Injury with Potential Regulation of TLR4 and NOD Signaling
Source: MDPI journal article supplement (doi:10.3390/antiox11020321), 2022-02-06
Supplement: s1 [file s1]

## Supplemental Material

**Table S1** Name, type, dilution, and source of primary antibodies<sup>1</sup>

| Antibody              | Isotype          | Dilution | Source                  |
|-----------------------|------------------|----------|-------------------------|
| Primary Antibody      |                  |          |                         |
| TLR4                  | Rabbit           | 1:1000   | ABclonal (Wuhan, China) |
| MyD88                 | Rabbit           | 1:1000   | ABclonal (Wuhan, China) |
| TRAF6                 | Rabbit           | 1:1000   | ABclonal (Wuhan, China) |
| NF- $\kappa$ B        | Rabbit           | 1:1000   | ABclonal (Wuhan, China) |
| p53                   | Rabbit           | 1:1000   | ABclonal (Wuhan, China) |
| BCL2                  | Rabbit           | 1:1000   | ABclonal (Wuhan, China) |
| $\beta$ -actin        | Rabbit           | 1:10000  | ABclonal (Wuhan, China) |
| Secondary Antibody    |                  |          |                         |
| HRP labelled Antibody | Goat anti rabbit | 1:10000  | ABclonal (Wuhan, China) |

<sup>1</sup>TLR4, toll like receptor 4; MyD88, myeloid differentiation factor 88; TRAF6, TNF- $\alpha$  receptor-associated factor 6; NF- $\kappa$ B, nuclear transcription factor kappaB; p53, tumor protein p53; BCL2, B-cell lymphoma 2.

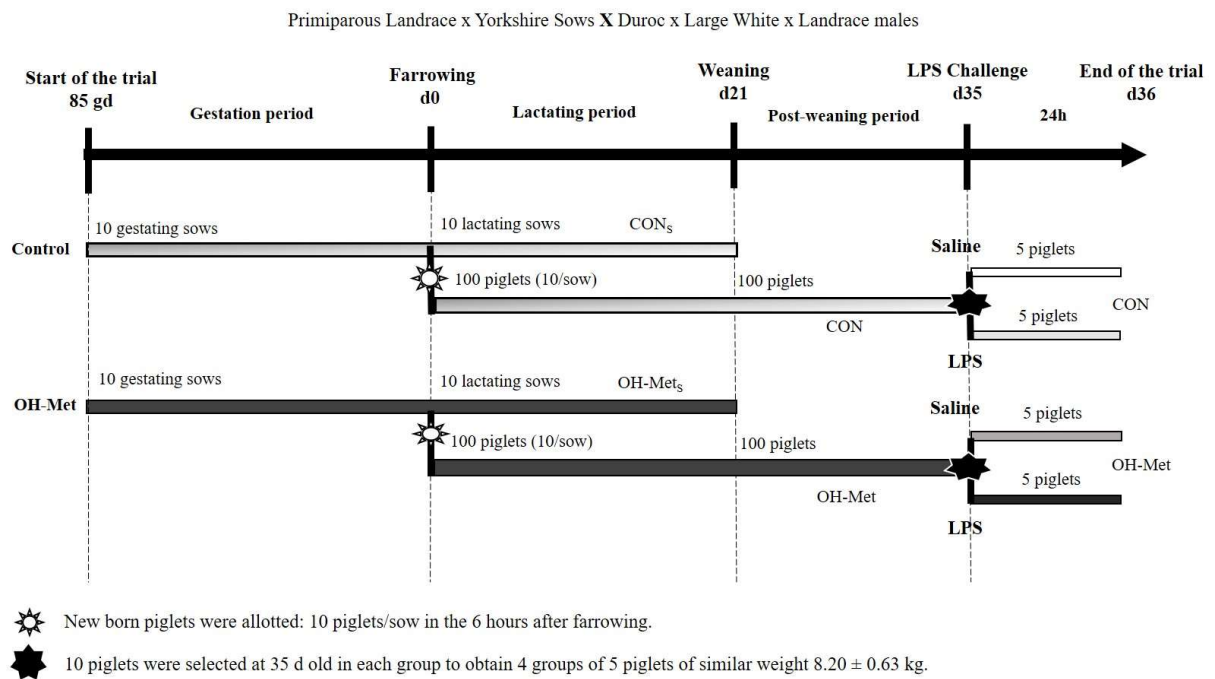

**Figure S1** Schematic of the experimental procedure of the animal trial

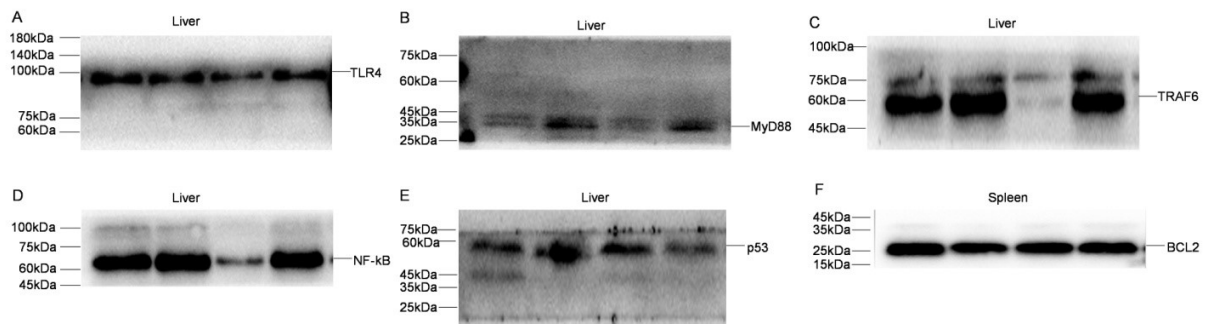

**Figure S2** Validation of the specificity of antibodies against and the correct bands of TRL4, MyD88, TRAF6, NF- $\kappa$ B, p53, and BCL2. Western blot gel bands of TRL4 (A), MyD88 (B), TRAF6 (C), NF- $\kappa$ B (D) and p53 (E) were verified with piglet liver samples, and BCL2 (F) was verified with piglet spleen samples.
